# Supplementary material
Source: PubMed Central journal article supplement (PMC3291952)
Supplement: NIHMS358074-supplement-1_si_001.pdf [file NIHMS358074-supplement-1_si_001.pdf]

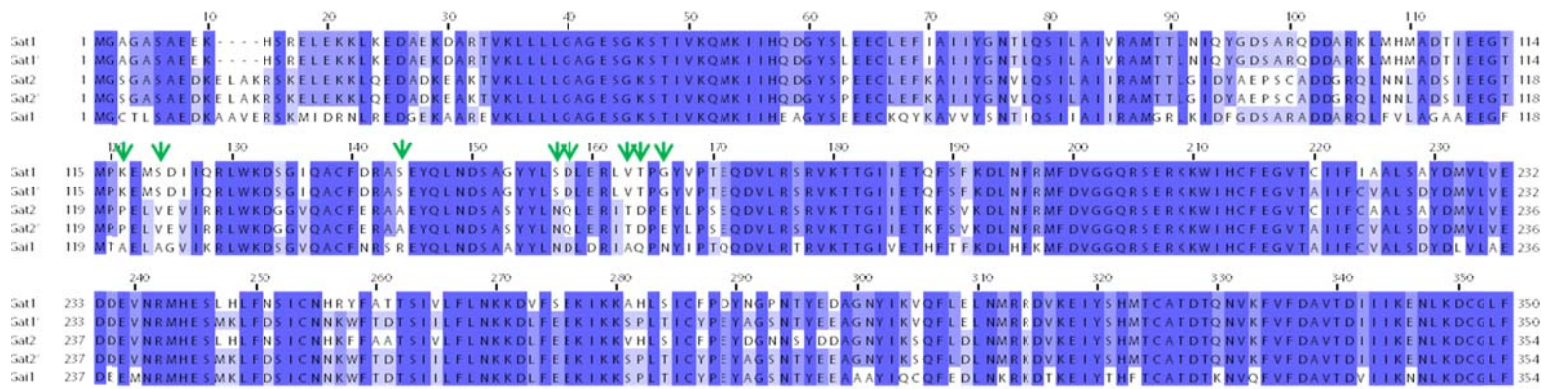

**Suppl. Figure 1.** Sequence alignment of bovine  $G\alpha_{11}$ , human  $G\alpha_{12}$ ,  $G\alpha_{11}$ , and chimeric  $G\alpha_{11}'$  and  $G\alpha_{12}'$ . Arrows indicate mutated  $G\alpha_{11}'$  residues.

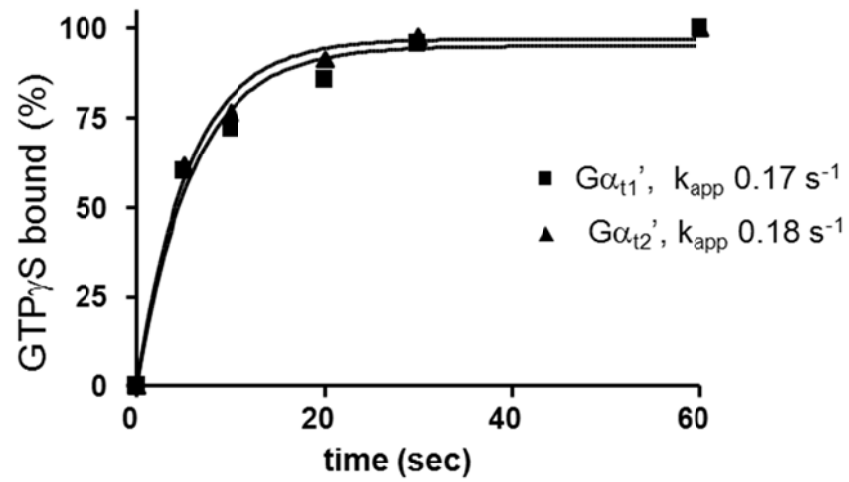

**Suppl. Figure 2.** Kinetics of GTP $\gamma$ S binding to  $G\alpha_{t1}'$  and  $G\alpha_{t2}'$  under the conditions of the single-turnover GTPase assay using uROS (2  $\mu$ M rhodopsin), 1  $\mu$ M  $G\alpha_{t1}'$  or  $G\alpha_{t2}'$ , 1  $\mu$ M  $G\beta_1\gamma_1$  and 100 nM [ $^{35}$ S]GTP $\gamma$ S instead of [ $\gamma$ - $^{32}$ P]GTP.

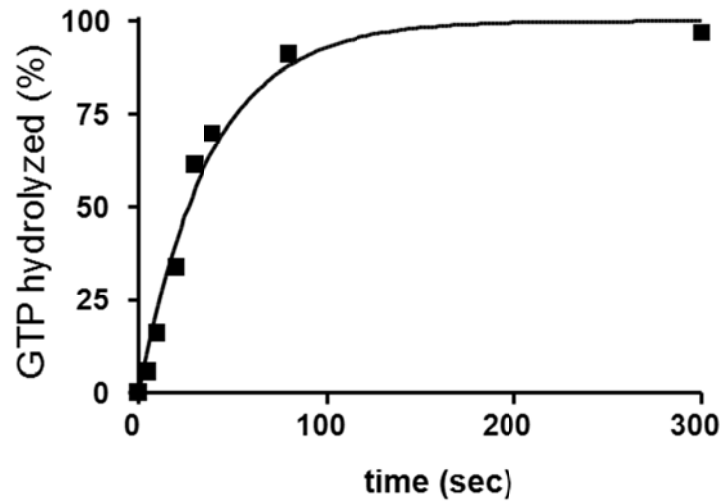

**Suppl. Figure 3.** Single turnover GTPase assay of  $G\alpha_{t2}^1-2$ . GTPase activity measurements were carried out in suspensions of uROS membranes (10  $\mu\text{M}$  rhodopsin) reconstituted with  $G\alpha_{t2}^1-2$  (1  $\mu\text{M}$ ) and  $G\beta_1\gamma_1$  (1  $\mu\text{M}$ ). Reactions were started with the addition of 100 nM  $[\gamma\text{-}^{32}\text{P}]\text{GTP}$  and free  $^{32}\text{P}_i$  was measured by liquid scintillation. Results from one of three similar experiments are shown ( $k_{\text{cat}} = 0.026 \text{ s}^{-1}$ ).
